# Supplementary material for: Dispersal syndromes drive the formation of biogeographical regions, illustrated by the case of Wallace’s Line
Source: PubMed Central journal article supplement (PMC7986858; doi:10.1111/geb.13250), 2021-01-06

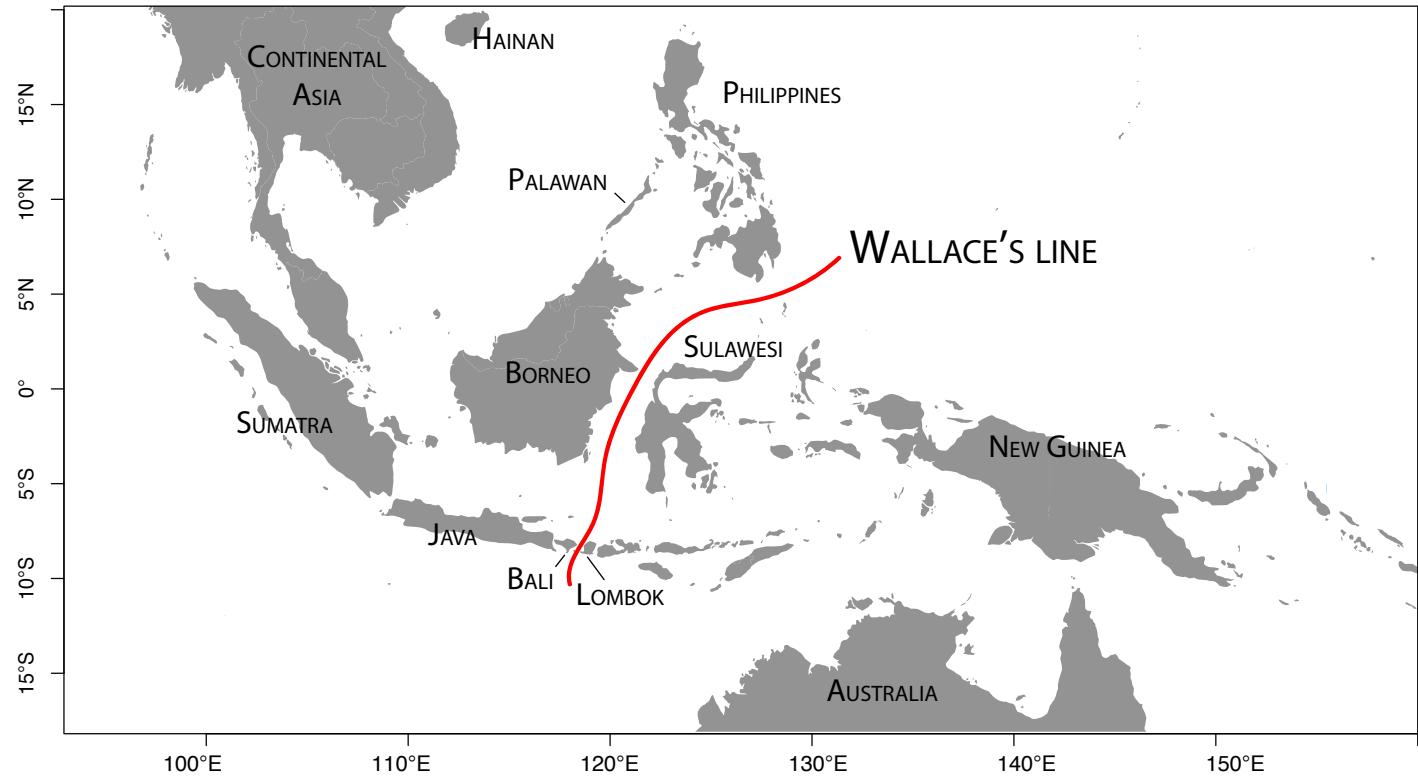

Supplement: GEB-30-685-s005.pdf [file GEB-30-685-s005.pdf]
